# Supplementary material for: Assessment of Acute Kidney Injury and Longitudinal Kidney Function After Hospital Discharge Among Patients With and Without COVID-19
Source: PubMed Central journal article supplement (PMC7948062; doi:10.1001/jamanetworkopen.2021.1095), 2021-03-10
Supplement: jamanetwopen-e211095-s001.pdf [file jamanetwopen-e211095-s001.pdf]

## Supplementary Online Content

Nugent J, Aklilu A, Yamamoto Y, et al. Assessment of acute kidney injury and longitudinal kidney function after hospital discharge among patients with and without COVID-19. *JAMA Netw Open*. 2021;4(3):e211095.  
doi:10.1001/jamanetworkopen.2021.1095

**eTable 1.** Characteristics of Included Patients and Patients Who Were Excluded Due to Lack of Serum Creatinine Measurement After Hospital Discharge

**eTable 2.** Inverse Propensity-Weighted Model of eGFR Slope After Hospital Discharge for Patients with COVID-19 AKI and COVID-19 Negative AKI

**eTable 3.** Joint Model of eGFR Slope After Hospital Discharge for Patients with COVID-19 AKI and COVID-19 Negative AKI

**eTable 4.** Mean eGFR Slope After Hospital Discharge by COVID-19 Status Using Rolling Baseline Definition of AKI (N=1219)

**eFigure 1.** Time to AKI Recovery After Hospital Discharge for Patients Who Had Not Returned to Baseline Kidney Function by Discharge

**eFigure 2.** Measurement of Serum Creatinine at Different Time Points From Baseline to Six Months After Hospital Discharge for the Subgroup of Patients Who Had Not Returned to Baseline Kidney Function by Discharge

This supplementary material has been provided by the authors to give readers additional information about their work.

**eTable 1. Characteristics of Included Patients and Patients who were Excluded due to Lack of Serum Creatinine Measurement after Hospital Discharge**

| Variables                                         | Included Patients<br>(N=1612) | Excluded Patients<br>(N=2056) | p-value |
|---------------------------------------------------|-------------------------------|-------------------------------|---------|
| <b>Demographics</b>                               |                               |                               |         |
| Age, years                                        | 69.7 (58.9,78.9)              | 69.3 (56.3,80.9)              | 0.63    |
| Sex, Female                                       | 813 (50.4%)                   | 1007 (49%)                    | 0.38    |
| Race, Black                                       | 298 (18.5%)                   | 409 (19.9%)                   | 0.28    |
| Ethnicity, Hispanic                               | 166 (10.3%)                   | 294 (14.3%)                   | <0.001  |
| Body mass index, kg/m <sup>2</sup>                | 28.3 (24.1,34.5)              | 28.1 (23.7,34.1)              | 0.07    |
| <b>Comorbidities</b>                              |                               |                               |         |
| Congestive heart failure                          | 784 (48.6%)                   | 806 (39.2%)                   | <0.001  |
| Chronic obstructive pulmonary disease             | 749 (46.5%)                   | 855 (41.6%)                   | 0.003   |
| Liver disease                                     | 389 (24.1%)                   | 419 (20.4%)                   | 0.007   |
| Chronic kidney disease                            | 561 (34.8%)                   | 531 (25.8%)                   | <0.001  |
| Hypertension                                      | 1429 (88.6%)                  | 1706 (83%)                    | <0.001  |
| Diabetes mellitus                                 | 838 (52%)                     | 985 (47.9%)                   | 0.01    |
| Elixhauser comorbidity score                      | 9 (5,12)                      | 7 (4,11)                      | <0.001  |
| <b>Baseline Kidney Function</b>                   |                               |                               |         |
| Baseline creatinine, mg/dL                        | 1.1 (0.8,1.4)                 | 1 (0.8,1.4)                   | 0.02    |
| Baseline eGFR, mL/min/1.73m <sup>2</sup>          | 64.3 (43.6,86.4)              | 66.2 (43.8,91.3)              | 0.01    |
| <b>Hospitalization Factors</b>                    |                               |                               |         |
| Proteinuria on admission                          | 331 (20.5%)                   | 411 (20%)                     | 0.61    |
| Peak creatinine, mg/dL                            | 1.7 (1.3,2.4)                 | 1.6 (1.2,2.2)                 | <0.001  |
| Stage 1 AKI                                       | 1215 (75.4%)                  | 1591 (77.4%)                  | 0.15    |
| Stage 2 AKI                                       | 267 (16.6%)                   | 326 (15.9%)                   | 0.56    |
| Stage 3 AKI                                       | 130 (8.1%)                    | 139 (6.8%)                    | 0.13    |
| Dialysis requirement                              | 24 (1.5%)                     | 34 (1.7%)                     | 0.69    |
| Duration of inpatient dialysis, days              | 7.1 (1.1,15.7)                | 7 (1.5,22.6)                  | 0.65    |
| Length of hospital stay, days                     | 7.6 (4.3,13.5)                | 8 (4.5,15.5)                  | 0.004   |
| AKI recovery at discharge                         | 1293 (80.2%)                  | 1640 (79.8%)                  | 0.74    |
| Duration of in-hospital AKI, days                 | 1.2 (0.8,2.2)                 | 1.1 (0.8,2.1)                 | 0.14    |
| ICU admission                                     | 603 (37.4%)                   | 802 (39%)                     | 0.32    |
| Length of ICU stay, days                          | 3.8 (1.9,7.3)                 | 3.9 (1.8,9.6)                 | 0.15    |
| Ventilator requirement                            | 218 (13.5%)                   | 338 (16.4%)                   | 0.01    |
| Vasopressor requirement                           | 310 (19.2%)                   | 421 (20.5%)                   | 0.35    |
| Discharge creatinine, mg/dL                       | 1.1 (0.8,1.6)                 | 1 (0.8,1.4)                   | <0.001  |
| Discharge eGFR, mL/min/1.73m <sup>2</sup>         | 59.5 (38.2,86.1)              | 68.3 (45.4,93.8)              | <0.001  |
| Delta creatinine<br>(discharge – baseline), mg/dL | 0 (-0.2,0.3)                  | 0 (-0.2,0.2)                  | <0.001  |
| ACEi or ARB at discharge                          | 334 (20.7%)                   | 407 (19.8%)                   | 0.50    |
| Loop diuretic administration                      | 818 (50.7%)                   | 873 (42.5%)                   | <0.001  |
| Systemic corticosteroid administration            | 376 (23.3%)                   | 450 (21.9%)                   | 0.30    |

eGFR, estimated glomerular filtration rate; AKI, acute kidney injury, ICU intensive care unit; ACEi, ACE-inhibitor; ARB, angiotensin receptor blocker

Data expressed as median (IQR) or No. (%).

**eTable 2. Inverse Propensity-Weighted Model of eGFR Slope After Hospital Discharge for Patients with COVID-19 AKI and COVID-19 negative AKI**

|                     | <b>Unadjusted mean eGFR slope<br/>(95% CI)</b> | <b>p-<br/>value</b> | <b>Adjusted mean eGFR slope *<br/>(95% CI)</b> | <b>p-<br/>value</b> | <b>Adjusted mean eGFR slope **<br/>(95% CI)</b> | <b>p-<br/>value</b> |
|---------------------|------------------------------------------------|---------------------|------------------------------------------------|---------------------|-------------------------------------------------|---------------------|
| Difference in Slope | -12.1 (-23.8, -0.4)                            | 0.04                | -13.3 (-25.2, -1.3)                            | 0.03                | -14.9 (-26.7, -3.1)                             | 0.01                |
| COVID+ AKI          | -12.1 (-23.0, -1.1)                            |                     | -17.4 (-45.5, 10.8)                            |                     | -17.2 (-45.0, 10.6)                             |                     |
| COVID- AKI          | 0.05 (-4.1, 4.2)                               |                     | -4.1 (-29.4, 21.2)                             |                     | -2.3 (-27.3, 22.6)                              |                     |

*eGFR, estimated glomerular filtration rate (mL/min/1.73m<sup>2</sup>/yr); AKI, acute kidney injury; CI, confidence interval*

*\* adjusted for age, sex, race, body mass index, hospital of admission, baseline eGFR, Elixhauser comorbidity score, congestive heart failure, hypertension, diabetes mellitus*

*\*\* adjusted for \* plus peak creatinine and dialysis requirement*

| <b>eTable 3. Joint Model of eGFR Slope After Hospital Discharge for Patients with COVID AKI and COVID-negative AKI</b> |                                                                        |                     |                                                                        |                     |                                                                         |                     |
|------------------------------------------------------------------------------------------------------------------------|------------------------------------------------------------------------|---------------------|------------------------------------------------------------------------|---------------------|-------------------------------------------------------------------------|---------------------|
|                                                                                                                        | <b>Unadjusted mean eGFR slope<br/>(95% Bayesian Credible Interval)</b> | <b>p-<br/>value</b> | <b>Adjusted mean eGFR slope *<br/>(95% Bayesian Credible Interval)</b> | <b>p-<br/>value</b> | <b>Adjusted mean eGFR slope **<br/>(95% Bayesian Credible Interval)</b> | <b>p-<br/>value</b> |
| Difference in Slope                                                                                                    | -10.0 (-17.8, -2.3)                                                    | 0.009               | -10.9 (-19.1, -3.0)                                                    | 0.007               | -12.2 (-19.8, -4.2)                                                     | 0.002               |
| COVID+ AKI                                                                                                             | -11.0 (-18.3, -3.7)                                                    |                     | -10.0 (-23.4, 3.3)                                                     |                     | -11.1 (-24.3, 2.4)                                                      |                     |
| COVID- AKI                                                                                                             | -1.0 (-3.7, 1.9)                                                       |                     | 0.9 (-10.0, 11.3)                                                      |                     | 1.1 (-9.4, 12.1)                                                        |                     |
| Association parameter                                                                                                  | -0.005 (-0.01, 0.003)                                                  | 0.24                | -0.005 (-0.01, 0.003)                                                  | 0.39                | -0.01 (-0.03, 0.01)                                                     | 0.26                |

*eGFR, estimated glomerular filtration rate (mL/min/1.73m<sup>2</sup>/yr); AKI, acute kidney injury; CI, confidence interval*

*\* Both submodels in the joint model (linear mixed model and survival mixed model) were adjusted for age, sex, race, body mass index, hospital of admission, baseline eGFR, Elixhauser comorbidity score, congestive heart failure, hypertension, diabetes mellitus*

*\*\* Both submodels were adjusted for \* plus peak creatinine and dialysis requirement*

**eTable 4. Mean eGFR Slope After Hospital Discharge by COVID-19 Status Using Rolling Baseline Definition of AKI (N=1219)<sup>1</sup>**

|                     | <b>Unadjusted mean eGFR slope<br/>(95% CI)</b> | <b>p-<br/>value</b> | <b>Adjusted mean eGFR slope *<br/>(95% CI)</b> | <b>p-<br/>value</b> | <b>Adjusted mean eGFR slope **<br/>(95% CI)</b> | <b>p-<br/>value</b> |
|---------------------|------------------------------------------------|---------------------|------------------------------------------------|---------------------|-------------------------------------------------|---------------------|
| Difference in Slope | -10.8 (-23.5, 1.9)                             | 0.09                | -12.9 (-26.2, 0.3)                             | 0.06                | -14.5 (-27.5, -1.5)                             | 0.03                |
| COVID+ AKI          | -9.4 (-21.2, 2.3)                              |                     | -24.7 (-56.5, 7.2)                             |                     | -24.4(-55.7, 6.9)                               |                     |
| COVID- AKI          | 1.4 (-3.4, 6.3)                                |                     | 11.7 (-40.5, 17.0)                             |                     | -9.9 (-38.1, 18.3)                              |                     |

*eGFR, estimated glomerular filtration rate (mL/min/1.73m<sup>2</sup>/yr); AKI, acute kidney injury; CI, confidence interval*

<sup>1</sup>*A total of 34 COVID+ patients and 359 COVID- patients were excluded from this sensitivity analysis due to meeting AKI criteria based on their prehospital outpatient baseline creatinine but not based on the rolling baseline approach.*

*\* adjusted for age, sex, race, body mass index, hospital of admission, baseline eGFR, Elixhauser comorbidity score, congestive heart failure, hypertension, diabetes mellitus*

*\*\* adjusted for \* plus peak creatinine and dialysis requirement*

**eFigure 1. Time to AKI Recovery after Hospital Discharge for Patients who had not Returned to Baseline Kidney Function by Discharge**

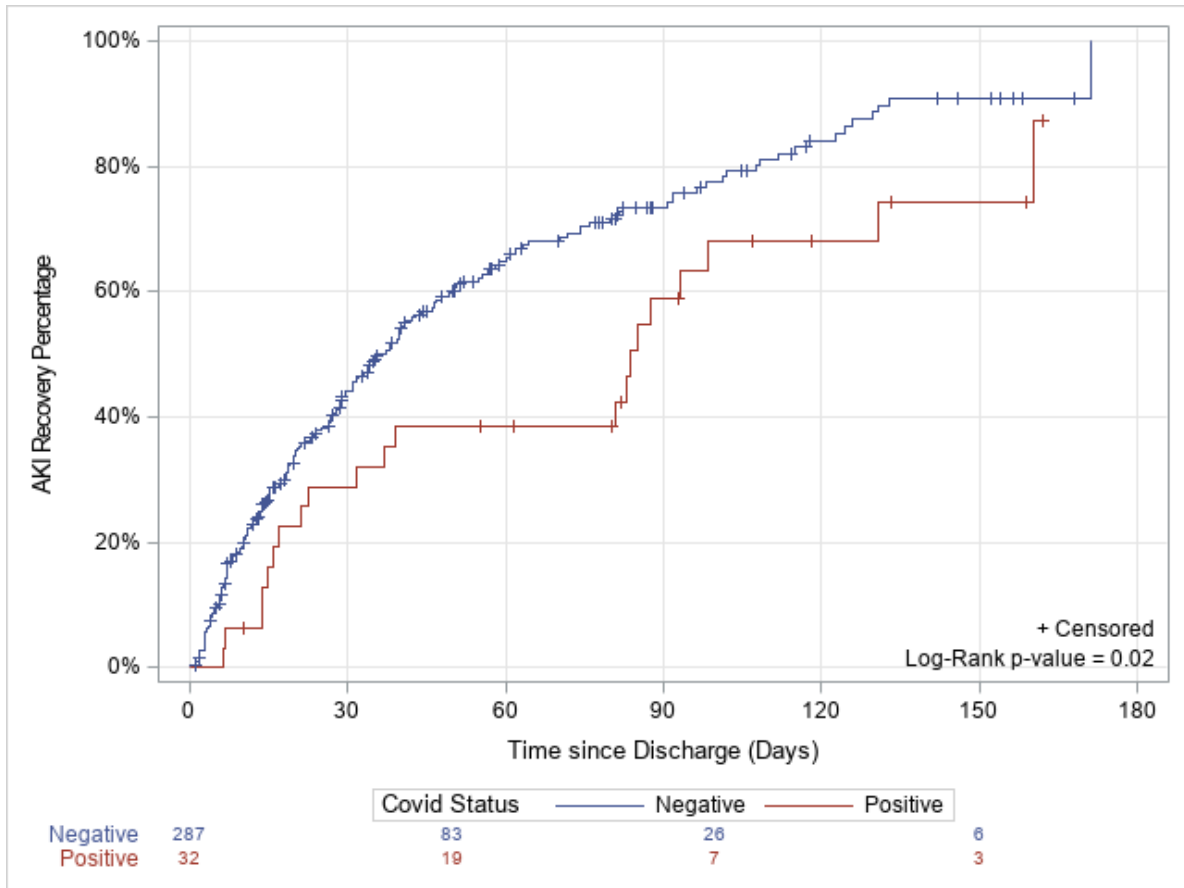

Survival curves for time to AKI recovery after discharge, defined as a serum creatinine <1.5 times the baseline creatinine, are shown for the subgroup of patients who had not achieved AKI recovery by the time of discharge from the hospital (n=319). AKI, acute kidney injury

**eFigure 2. Measurement of Serum Creatinine at Different Time Points from Baseline to Six Months after Hospital Discharge for the Subgroup of Patients who had not Returned to Baseline Kidney Function by Discharge**

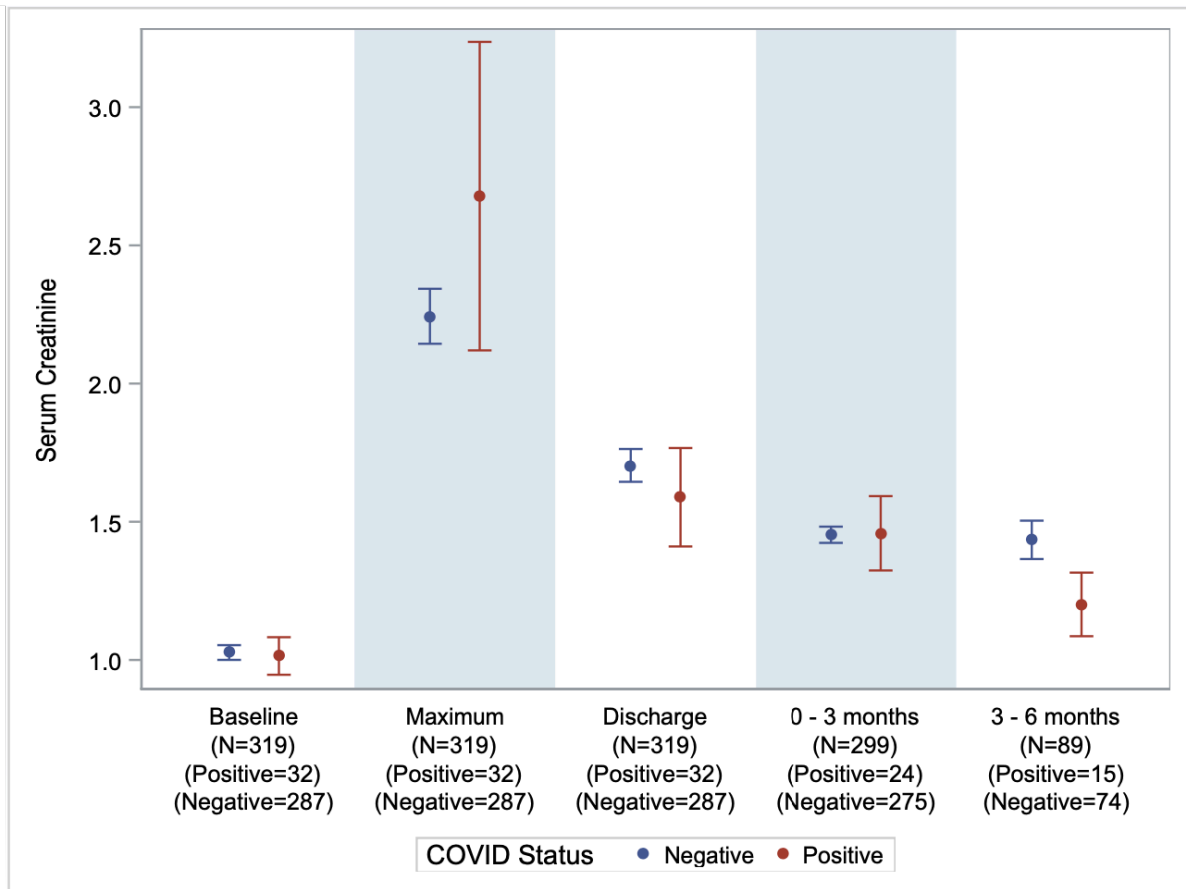

Mean (SE) serum creatinine measurements are shown at different time points from baseline to six months after hospital discharge for the subgroup of patients who had not returned to baseline kidney function by discharge.

AKI, acute kidney injury; SE, standard error
